# Supplementary material for: Green Extraction of Bioactive Compounds from Cumari-Do-Pará (Capsicum chinense Jacq.) Peppers Harvested from Different Locations and Maturation Stages Employing Ultrasonic-Assisted Extraction and Edible Vegetable Oils
Source: Preprints.org preprint supplement (doi:10.20944/preprints202407.1696.v1), 2024-07-22
Supplement: Supplementary file 1 [file supplementary]

| Pepper extracts | Bioactive compounds | ABTS  (μM trolox g-1) | β-carotene/linoleic acid %AA (60 min) |
| --- | --- | --- | --- |
|  | r |
| Organic solvent | Vitamin C (mg.100 g-1) | -0.79 | -0.90 |
| Total phenolic (mg GAE.100 g-1) | 0.97* | 1.00* |
| Total carotenoids ( μg.g-1) | 0.61 | 0.74 |
| Capsaicin (mg.g-1) | 0.81 | 0.70 |
| Vegetable oils | Total phenolic (mg GAE.100g) | 0.97* | 0.93* |
| Total carotenoids ( μg.g-1) | 0.78* | 0.85* |
| Capsaicin (mg.g-1) | 0.86* | 0.79* |

**Table S1 - Pearson's correlation coefficient (r) between bioactive compounds and the antioxidant capacity of pepper extracts obtained with organic solvents and vegetable oils.**

Tukey test (p ≤ 0.05) r= Pearson's correlation coefficient

*Significant static correlation between the bioactive compound and antioxidant activity.

Negative values demonstrate a negative correlation, and positive values demonstrate a positive correlation. The closer to r = 1, the greater the association between bioactive compounds and antioxidant activity (ABTS and β-carotene/linoleic acid).
